# Supplementary material for: Albumin Kinetics in Patients Undergoing Major Abdominal Surgery
Source: PubMed Central journal article supplement (PMC4552033; doi:10.1371/journal.pone.0136371), 2015-08-27
Supplement: pone.0136371.s004.pdf [file pone.0136371.s004.pdf]

Table 1.

Patient characteristics, individual data

| subject                 | # 1  | # 2  | # 3  | # 4  | # 5  | # 6  | # 7  | # 8  | # 9  | # 10 | mean | SD   | median | range      |
|-------------------------|------|------|------|------|------|------|------|------|------|------|------|------|--------|------------|
| gender                  | m    | f    | f    | m    | f    | m    | f    | m    | m    | m    |      |      |        | m:6, f:4   |
| age, year               | 52   | 55   | 63   | 64   | 44   | 65   | 65   | 67   | 69   | 66   | 61   | 8    | 65     |            |
| height, cm              | 183  | 164  | 159  | 179  | 168  | 189  | 160  | 173  | 173  | 179  | 173  | 10   | 173    |            |
| weight, kg              | 80   | 68   | 66   | 83   | 62   | 83   | 51   | 65   | 86   | 86   | 73   | 12   | 74     |            |
| BMI, kg/cm <sup>2</sup> | 23,9 | 25,3 | 26,1 | 25,9 | 22,0 | 23,2 | 19,9 | 21,7 | 28,7 | 26,8 | 24,4 | 2,7  | 24,6   |            |
| weight loss, kg         | 0    | 0    | 0    | 0    | 0    | 0    | 0    | 0    | 5    | 0    | na   | na   | 0      | 0-5        |
| P-cratinine, μmol/L     | 46   | 49   | 50   | 98   | 66   | 89   | 47   | 70   | 81   | 74   | 67   | 19   | 68     |            |
| P-bilirubin             | 7    | 9    | 5    | 8    | 4    | 9    | 7    | 22   | 3    | 7    | 8    | 5    | 7      |            |
| P-ASAT                  | 0,43 | 0,66 | 0,28 | 0,62 | 0,4  | 0,35 | 0,25 | 0,59 | 0,28 | 0,43 | 0,43 | 0,15 | 0,42   |            |
| P-ALAT                  | 0,94 | 1,02 | 0,21 | 0,63 | 0,47 | 0,18 | 0,25 | 0,65 | 0,21 | 0,33 | 0,49 | 0,31 | 0,40   |            |
| P-GT                    | 0,44 | 1,6  | 0,47 | 0,87 | 0,69 | 0,67 | 0,7  | 2,4  | 0,41 | 0,48 | 0,87 | 0,64 | 0,68   |            |
| P-pancreasamylas        | 0,34 | 0,13 | 1,51 | 0,2  | 0,13 | 1,67 | 0,13 | 0,16 | 0,84 | 0,49 | 0,56 | 0,59 | 0,27   |            |
| ASA                     | 2    | 3    | 2    | 3    | 2    | 2    | 3    | 3    | 3    | 3    |      |      |        | 2: 4, 3: 6 |

Table 2.

Physiological data before and 2 days after major pancreatic surgery, individual values

| Day 0            | subject            | # 1  | # 2  | # 3  | # 4  | # 5  | # 6  | # 7  | # 8  | # 9  | # 10 | mean | SD   | median | range      |
|------------------|--------------------|------|------|------|------|------|------|------|------|------|------|------|------|--------|------------|
| SAP              | mmHg               | 115  | 126  | 88   | 131  | 140  | 127  | 125  | 112  | 125  | 150  | 124  | 17   | 126    |            |
| DAP              | mmHg               | 60   | 64   | 47   | 65   | 70   | 63   | 45   | 58   | 65   | 75   | 61   | 9    | 64     |            |
| MAP              | mmHg               | 78   | 85   | 61   | 87   | 93   | 84   | 72   | 76   | 85   | 100  | 82   | 11   | 85     |            |
| Heart Rate       | beats/min          | 68   | 77   | 53   | 65   | 91   | 51   | 62   | 68   | 64   | 75   | 67   | 12   | 67     |            |
| Respiratory Rate | per min            | 12   | 18   | 14   | 11   | 14   | 11   | 14   | 12   | 19   | 12   | 13,7 | 2,8  | 13     | 11-19      |
| Body temperature | °C                 | 36,3 | 36,9 | 36,8 | 36,3 | 37,4 | 36,4 |      | 36,5 | 36,7 | 36,4 | 36,6 | 0,4  | 36,5   |            |
| B-WBC            | 10 <sup>9</sup> /L | 6,8  | 3,2  | 7    | 5,8  | 7,2  | 5,4  | 5,9  | 7,5  | 5    | 5,6  | 5,9  | 1,3  | 5,9    |            |
| P-CRP            | mg/L               | 0    | 3    | 1    | 7    | 3    | 1    | 1    | 1    | 16   | 1    | 3    | 5    | 1      | 0,47-16,17 |
| B-Hb             | g/L                | 131  | 141  | 149  | 138  | 147  | 149  | 135  | 134  | 98   | 153  | 138  | 16   | 140    |            |
| Body weight      | kg                 | 81,2 | 68   | 64,8 | 82,7 | 62,5 | 83,4 | 50,6 | 65,1 | 85,7 | 85   | 72,9 | 12,2 | 74,6   |            |
| Day 2            | subject            | # 1  | # 2  | # 3  | # 4  | # 5  | # 6  | # 7  | # 8  | # 9  | # 10 | mean | SD   | median | range      |
| SAP              | mmHg               | 145  | 124  | 108  | 171  | 121  | 126  | 160  | 113  | 93   | 132  | 129  | 24   | 125    |            |
| DAP              | mmHg               | 65   | 54   | 55   | 91   | 62   | 75   | 60   | 69   | 66   | 62   | 66   | 11   | 64     |            |
| MAP              | mmHg               | 92   | 77   | 73   | 118  | 82   | 92   | 93   | 84   | 75   | 85   | 87   | 13   | 85     |            |
| Heart Rate       | beats/min          | 71   | 95   | 90   | 102  | 94   | 61   | 88   | 96   | 75   | 68   | 84   | 14   | 89     |            |
| Respiratory Rate | per min            | 17   | 20   | 19   | 15   | 18   | 16   | 15   | 15   | 18   | 15   | 16,8 | 1,9  | 16,5   | 15-20      |
| Body temperature | °C                 | 37,2 | 38,8 | 38   | 38,1 | 37,8 | 37,2 | 38   | 37,6 | 37,4 | 38,1 | 37,8 | 0,5  | 37,9   |            |
| B-WBC            | 10 <sup>9</sup> /L | 7    | 9    | 10,1 | 21   | 11,8 | 15,1 | 10,8 | 8    | 19,3 | 12,4 | 12,5 | 4,7  | 11,3   |            |
| P-CRP            | mg/L               | 42   | 135  | 145  | 234  | 120  | 36   | 112  | 25   | 195  | 200  | 124  | 73   | 127    | 25-234     |
| B-Hb             | g/L                | 104  | 92   | 98   | 113  | 95   | 115  | 104  | 96   | 102  | 114  | 103  | 8    | 103    |            |
| Body weight      | kg                 | 80,3 | 73,3 | 68,9 | 86,6 | 65,7 | 83,8 | 52   | 68,7 | 89,7 | 87,6 | 75,7 | 12,0 | 76,8   |            |

Table 2. continued

| Day 2 -0         | subject            | # 1      | # 2      | # 3    | # 4      | # 5       | # 6      | # 7      | # 8      | # 9    | # 10      | mean | SD | median | range  |
|------------------|--------------------|----------|----------|--------|----------|-----------|----------|----------|----------|--------|-----------|------|----|--------|--------|
| SAP              | mmHg               | 30       | -2       | 20     | 40       | -19       | -1       | 35       | 1        | -32    | -18       | 5    | 25 | 0      |        |
| DAP              | mmHg               | 5        | -10      | 8      | 26       | -8        | 12       | 15       | 11       | 1      | -13       | 5    | 12 | 7      |        |
| MAP              | mmHg               | 13,33333 | -7,33333 | 12     | 30,66667 | -11,66667 | 7,666667 | 21,66667 | 7,666667 | -10    | -14,66667 | 5    | 15 | 8      |        |
| Heart Rate       | beats/min          | 3        | 18       | 37     | 37       | 3         | 10       | 26       | 28       | 11     | -7        | 17   | 15 | 15     |        |
| Respiratory Rate | per min            | 5        | 2        | 5      | 4        | 4         | 5        | 1        | 3        | -1     | 3         | 3    | 2  | 4      | -1 - 5 |
| Body temperature | °C                 | 0,9      | 1,9      | 1,2    | 1,8      | 0,4       | 0,8      |          | 1,1      | 0,7    | 1,7       | 1    | 1  | 1      |        |
| B-WBC            | 10 <sup>9</sup> /L | 0,2      | 5,8      | 3,1    | 15,2     | 4,6       | 9,7      | 4,9      | 0,5      | 14,3   | 6,8       | 7    | 5  | 5      |        |
| P-CRP            | mg/L               | 41,62    | 131,6    | 144,08 | 227,04   | 116,98    | 34,89    | 110,89   | 24,1     | 178,45 | 198,88    | 121  | 70 | 124    | 24-227 |
| B-Hb             | g/L                | -27      | -49      | -51    | -25      | -52       | -34      | -31      | -38      | 4      | -39       | -34  | 17 | -36    |        |
| Body weight      | kg                 | -0,9     | 5,3      | 4,1    | 3,9      | 3,2       | 0,4      | 1,4      | 3,6      | 4      | 2,6       | 3    | 2  | 3      |        |

Table 3.

## Albumin kinetic parameters, individual data

| <b>Day 0</b>  | <b>subject</b> | <b># 1</b> | <b># 2</b> | <b># 3</b> | <b># 4</b> | <b># 5</b> | <b># 6</b> | <b># 7</b> | <b># 8</b> | <b># 9</b> | <b># 10</b> | <b>mean</b> | <b>SD</b> | <b>median</b> |
|---------------|----------------|------------|------------|------------|------------|------------|------------|------------|------------|------------|-------------|-------------|-----------|---------------|
| P-alb         | g/L            | 35,3       | 28,8       | 36,7       | 39,3       | 35,6       | 32,2       | 32,6       | 33,4       | 26,7       | 34,7        | 33,5        | 3,7       | 34,1          |
| Plasma volume | mL             | 4197       | 2924       | 2721       | 3078       | 2644       | 3938       | 2397       | 3414       | 4178       | 3614        | 3311        | 655       | 3246          |
| Blood volume  | L              | 6,40       | 4,69       | 4,25       | 4,86       | 4,14       | 6,60       | 3,73       | 5,28       | 5,46       | 6,19        | 5,16        | 1,00      | 5,07          |
| IAM           | g              | 148        | 84         | 100        | 121        | 94         | 127        | 78         | 114        | 112        | 125         | 110         | 21        | 113           |
| FSR           | %/d            | 8,0        | 10,1       | 10,6       | 9,2        | 12,0       | 11,1       | 9,1        | 14,6       | 21,5       | 10,4        | 11,7        | 3,9       | 10,5          |
| ASR           | mg/kg/d        | 147        | 125        | 164        | 135        | 180        | 169        | 141        | 255        | 280        | 154         | 175         | 52        | 159           |
| TER           | %/h            | 3,2        | 5,0        | 2,5        | 0,7        | 7,7        | 4,1        | 9,9        | 5,4        | 5,7        | 5,0         | 4,9         | 2,6       | 5,0           |
| Alb mass flow | g/h            | 4,8        | 4,2        | 2,5        | 0,8        | 7,3        | 5,2        | 7,7        | 6,2        | 6,3        | 6,2         | 5,1         | 2,1       | 5,7           |
| Body weight   | kg             | 81,2       | 68         | 64,8       | 82,7       | 62,5       | 83,4       | 50,6       | 65,1       | 85,7       | 85          | 72,9        | 12,2      | 74,6          |
| Haematocrit   | fraction       | 0,403      | 0,433      | 0,418      | 0,424      | 0,4195     | 0,457      | 0,415      | 0,412      | 0,304      | 0,469       | 0,415       | 0,044     | 0,419         |

  

| <b>Day 2</b>  | <b>subject</b> | <b># 1</b> | <b># 2</b> | <b># 3</b> | <b># 4</b> | <b># 5</b> | <b># 6</b> | <b># 7</b> | <b># 8</b> | <b># 9</b> | <b># 10</b> | <b>mean</b> | <b>SD</b> | <b>median</b> |
|---------------|----------------|------------|------------|------------|------------|------------|------------|------------|------------|------------|-------------|-------------|-----------|---------------|
| P-alb         | g/L            | 24,9       | 17,7       | 25,5       | 25,6       | 19,5       | 23,9       | 23,1       | 19         | 18,2       | 23,4        | 22,1        | 3,1       | 23,3          |
| Plasma volume | mL             | 4419       | 2629       | 2845       | 2795       | 3389       | 3686       | 2791       | 3917       | 3341       | 3347        | 3316        | 574       | 3344          |
| Blood volume  | L              | 5,93       | 3,35       | 3,72       | 3,91       | 4,37       | 5,20       | 3,75       | 5,08       | 4,44       | 4,70        | 4,45        | 0,80      | 4,41          |
| IAM           | g              | 110        | 47         | 73         | 72         | 66         | 88         | 64         | 74         | 61         | 78          | 73          | 17        | 72            |
| FSR           | %/d            | 13,1       | 7,9        | 13,6       | 11,3       | 12,8       | 20,3       | 13,8       | 23,8       | 19,0       | 14,6        | 15,0        | 4,7       | 13,7          |
| ASR           | mg/kg/d        | 180        | 50         | 143        | 93         | 128        | 213        | 171        | 258        | 129        | 131         | 150         | 59        | 137           |
| TER           | %/h            | 2,5        | 4,7        | 4,7        | 10,0       | 7,0        | 4,8        | 3,9        | 3,2        | 7,7        | 6,8         | 5,5         | 2,3       | 4,8           |
| Alb mass flow | g/h            | 2,8        | 2,2        | 3,4        | 7,2        | 4,6        | 4,2        | 2,5        | 2,4        | 4,7        | 5,3         | 3,9         | 1,6       | 3,8           |
| Body weight   | kg             | 80,3       | 73,3       | 68,9       | 86,6       | 65,7       | 83,8       | 52         | 68,7       | 89,7       | 87,6        | 75,7        | 12,0      | 76,8          |
| Haematocrit   | fraction       | 0,322      | 0,286      | 0,304      | 0,349      | 0,295      | 0,355      | 0,322      | 0,298      | 0,316      | 0,352       | 0,320       | 0,025     | 0,319         |

  

| <b>Day 2 - day 0</b> | <b>subject</b> | <b># 1</b> | <b># 2</b> | <b># 3</b> | <b># 4</b> | <b># 5</b> | <b># 6</b> | <b># 7</b> | <b># 8</b> | <b># 9</b> | <b># 10</b> | <b>mean</b> | <b>SD</b> | <b>median</b> |
|----------------------|----------------|------------|------------|------------|------------|------------|------------|------------|------------|------------|-------------|-------------|-----------|---------------|
| P-alb                | g/L            | -10,4      | -11,1      | -11,2      | -13,7      | -16,1      | -8,3       | -9,5       | -14,4      | -8,5       | -11,3       | -11,5       | 2,6       | -11,2         |
| Plasma volume        | L              | 222        | -294       | 124        | -283       | 745        | -252       | 394        | 503        | -837       | -267        | 5           | 475       | -64           |
| Blood volume         | L              | -0,47      | -1,34      | -0,53      | -0,96      | 0,23       | -1,40      | 0,02       | -0,21      | -1,02      | -1,49       | -0,72       | 0,61      | -0,75         |
| IAM                  | g              | -38        | -38        | -27        | -49        | -28        | -39        | -14        | -40        | -51        | -47         | -37         | 11        | -38           |
| FSR                  | %/d            | 5,1        | -2,1       | 3,0        | 2,1        | 0,8        | 9,1        | 4,7        | 9,2        | -2,5       | 4,2         | 3,4         | 4,0       | 3,6           |
| ASR                  | mg/kg/d        | 33         | -74        | -20        | -41        | -52        | 43         | 30         | 3          | -152       | -23         | -25         | 59        | -22           |
| TER                  | %/h            | -0,7       | -0,3       | 2,2        | 9,3        | -0,7       | 0,7        | -6,0       | -2,2       | 2,1        | 1,8         | 0,6         | 3,9       | 0,2           |
| Alb mass flow        | g/h            | -2,0       | -2,0       | 0,9        | 6,3        | -2,7       | -1,0       | -5,2       | -3,8       | -1,6       | -0,9        | -1,2        | 3,1       | -1,8          |

## Extra anthropometric data

| Data day 0 / Subject                 | 101   | 102    | 103   | 104    | 105    | 106   | 107    | 108   | 109    | 110    | Mean         | SD           | Median        |
|--------------------------------------|-------|--------|-------|--------|--------|-------|--------|-------|--------|--------|--------------|--------------|---------------|
| Blood pressure before dose, DAP mmHg | 115   | 126    | 88    | 131    | 140    | 127   | 125    | 112   | 125    | 150    | <b>123,9</b> | <b>16,7</b>  | <b>125,5</b>  |
| Blood pressure before dose, SAP mmHg | 60    | 64     | 47    | 65     | 70     | 63    | 45     | 58    | 65     | 75     | <b>61,2</b>  | <b>9,3</b>   | <b>63,5</b>   |
| Heart rate before dose               | 68    | 77     | 53    | 65     | 91     | 51    | 62     | 68    | 64     | 75     | <b>67,4</b>  | <b>11,7</b>  | <b>66,5</b>   |
| Respiratory rate before dose         | 12    | 18     | 14    | 11     | 14     | 11    | 14     | 12    | 19     | 12     | <b>13,7</b>  | <b>2,8</b>   | <b>13</b>     |
| Body temperature before dose         | 36,3  | 36,9   | 36,8  | 36,3   | 37,4   | 36,4  | miss   | 36,5  | 36,7   | 36,4   | <b>36,6</b>  | <b>0,4</b>   | <b>36,5</b>   |
| B-LPK                                | 6,8   | 3,2    | 7     | 5,8    | 7,2    | 5,4   | 5,9    | 7,5   | 5      | 5,6    | <b>5,9</b>   | <b>1,3</b>   | <b>5,85</b>   |
| P-CRP                                | 0,47  | 3,38   | 0,52  | 6,51   | 2,9    | 0,83  | 0,63   | 0,97  | 16,17  | 0,68   | <b>3,3</b>   | <b>4,9</b>   | <b>0,9</b>    |
| P-Albumin                            | 35,3  | 28,8   | 36,7  | 39,3   | 35,6   | 32,2  | 32,6   | 33,4  | 26,7   | 34,7   | <b>33,5</b>  | <b>3,7</b>   | <b>34,05</b>  |
| P-CRP routine d-30 till d0           | 2     | 4      | 0,9   | 7      | 3      | 2     | 0,9    | 1     | 30     | 0,9    | <b>5,2</b>   | <b>8,9</b>   | <b>2</b>      |
| P-Albumin routine d-30 till d0       | 38    | 35     | 44    | 40     | 41     | 37    | 37     | 34    | 28     | miss   | <b>37,1</b>  | <b>4,6</b>   | <b>37</b>     |
| B-Hb routine d-30 till d0            | 131   | 141    | 149   | 138    | 147    | 149   | 135    | 134   | 98     | 153    | <b>137,5</b> | <b>15,7</b>  | <b>139,5</b>  |
| P-kreatinin                          | 46    | 64     | 50    | 99     | 64     | 89    | 44     | 70    | 81     | 76     | <b>68,3</b>  | <b>18,4</b>  | <b>67</b>     |
| P-bilirubin                          | 7     | 9      | 5     | 8      | 4      | 9     | 7      | 22    | 3      | 7      | <b>8,1</b>   | <b>5,3</b>   | <b>7</b>      |
| P-ASAT                               | 0,43  | 0,66   | 0,28  | 0,62   | 0,4    | 0,35  | 0,25   | 0,59  | 0,28   | 0,43   | <b>0,4</b>   | <b>0,1</b>   | <b>0,415</b>  |
| P-ALAT                               | 0,94  | 1,02   | 0,21  | 0,63   | 0,47   | 0,18  | 0,25   | 0,65  | 0,21   | 0,33   | <b>0,5</b>   | <b>0,3</b>   | <b>0,4</b>    |
| P-GT                                 | 0,44  | 1,6    | 0,47  | 0,87   | 0,69   | 0,67  | 0,7    | 2,4   | 0,41   | 0,48   | <b>0,9</b>   | <b>0,6</b>   | <b>0,68</b>   |
| P-pancreasamylas                     | 0,34  | <0,13  | 1,51  | 0,2    | <0,13  | 1,67  | <0,13  | 0,16  | 0,84   | 0,49   | <b>0,7</b>   | <b>0,6</b>   | <b>0,49</b>   |
| Body Weight x                        | 81,2  | 68     | 64,8  | 82,7   | 62,5   | 83,4  | 50,6   | 65,1  | 85,7   | 85     | <b>72,9</b>  | <b>12,2</b>  | <b>74,6</b>   |
| Operating time, min                  | 340   | 230    | 522   | 501    | 365    | 300   | 208    | 598   | 359    | 357    | <b>378,0</b> | <b>126,3</b> | <b>358</b>    |
| Op-bleeding, ml                      | 3700  | 2600   | 800   | 1800   | 700    | 650   | 500    | 1400  | 850    | 520    | <b>1352</b>  | <b>1063</b>  | <b>825</b>    |
| Data dag 2                           | 101   | 102    | 103   | 104    | 105    | 106   | 107    | 108   | 109    | 110    | Mean         | SD           | Median        |
| Blood pressure before dose, DAP mmHg | 145   | 124    | 108   | 171    | 121    | 126   | 160    | 113   | 93     | 132    | <b>129,3</b> | <b>23,8</b>  | <b>125</b>    |
| Blood pressure before dose, SAP mmHg | 65    | 54     | 55    | 91     | 62     | 75    | 60     | 69    | 66     | 62     | <b>65,9</b>  | <b>10,8</b>  | <b>63,5</b>   |
| Heart rate before dose               | 71    | 95     | 90    | 102    | 94     | 61    | 88     | 96    | 75     | 68     | <b>84,0</b>  | <b>14,0</b>  | <b>89</b>     |
| Respiratory rate before dose         | 17    | 20     | 19    | 15     | 18     | 16    | 15     | 15    | 18     | 15     | <b>16,8</b>  | <b>1,9</b>   | <b>16,5</b>   |
| Body temperature before dose         | 37,2  | 38,8   | 38    | 38,1   | 37,8   | 37,2  | 38     | 37,6  | 37,4   | 38,1   | <b>37,8</b>  | <b>0,5</b>   | <b>37,9</b>   |
| B-LPK                                | 7     | 9      | 10,1  | 21     | 11,8   | 15,1  | 10,8   | 8     | 19,3   | 12,4   | <b>12,5</b>  | <b>4,7</b>   | <b>11,3</b>   |
| P-CRP                                | 42,09 | 134,98 | 144,6 | 233,55 | 119,88 | 35,72 | 111,52 | 25,07 | 194,62 | 199,56 | <b>124,2</b> | <b>72,8</b>  | <b>127,43</b> |
| P-Albumin                            | 24,9  | 17,7   | 25,5  | 25,6   | 19,5   | 23,9  | 23,1   | 19    | 18,2   | 23,4   | <b>22,1</b>  | <b>3,1</b>   | <b>23,25</b>  |
| P-CRP routine d2                     | 46    | 125    | 131   | 250    | 116    | 32    | 110    | 46    | 174    | 177    | <b>120,7</b> | <b>68,3</b>  | <b>120,5</b>  |
| P-albumin routine d2                 | 24    | 16     | 25    | 28     | 20     | 23    | 23     | 18    | 18     | 22     | <b>21,7</b>  | <b>3,7</b>   | <b>22,5</b>   |

## Extra anthropometric data, continued

| Data dag 2                    | 101  | 102  | 103  | 104  | 105  | 106     | 107     | 108     | 109     | 110     | Mean         | SD          | Median       |
|-------------------------------|------|------|------|------|------|---------|---------|---------|---------|---------|--------------|-------------|--------------|
| B-Hb routine d2               | 104  | 92   | 98   | 113  | 95   | 115     | 104     | 96      | 102     | 114     | <b>103,3</b> | <b>8,3</b>  | <b>103</b>   |
| P-kreatinin routine d2        | 41   | 54   | 36   | 153  | 54   | 72      | 33      | 67      | 82      | 75      | <b>66,7</b>  | <b>34,7</b> | <b>60,5</b>  |
| P-bilirubin routine d2        | 13   | 5    | 6    | 13   | 4    | 8       | 10      | 11      | 7       | 8       | <b>8,5</b>   | <b>3,2</b>  | <b>8</b>     |
| P-ASAT routine d2             | 0,8  | 0,75 | 0,61 | 2,01 | 0,7  | 0,71    | 0,59    | 10,42   | 0,68    | 0,74    | <b>1,8</b>   | <b>3,1</b>  | <b>0,725</b> |
| P-ALAT routine d2             | 1,69 | 0,68 | 0,62 | 1,73 | 0,51 | 0,43    | 0,39    | 6,12    | 0,32    | 0,83    | <b>1,3</b>   | <b>1,8</b>  | <b>0,65</b>  |
| P-GT routine d2               | 0,28 | 0,53 | 0,62 | 0,47 | 0,28 | 0,34    | 0,56    | 0,61    | 0,41    | 0,29    | <b>0,4</b>   | <b>0,1</b>  | <b>0,44</b>  |
| P-pancreasamylas routine d2   | 0,15 | 0,66 | 1,39 | 3,16 | 0,18 | 2,12    | 0,13    | 0,2     | 3,15    | 3,48    | <b>1,5</b>   | <b>1,4</b>  | <b>1,025</b> |
| Vikt d2                       | 80,3 | 73,3 | 68,9 | 86,6 | 65,7 | 83,8    | 52      | 68,7    | 89,7    | 87,6    | <b>75,7</b>  | <b>12,0</b> | <b>76,8</b>  |
| Vikt d2 - vikt x d0           | -0,9 | 5,3  | 4,1  | 3,9  | 3,2  | 0,4     | 1,4     | 3,6     | 4       | 2,6     | <b>2,8</b>   | <b>1,9</b>  | <b>3,4</b>   |
| EDA, dos ml/h                 | 10   | 8    | 8    | 13   | 15   | 12      | 15      | 8       | 9       | 6       | <b>10,4</b>  | <b>3,2</b>  | <b>9,5</b>   |
| NRS                           | 2    | 2    | 2    | 3    | 5    | 3       | 3       | 2       | 2       | 2       | <b>2,6</b>   | <b>1,0</b>  | <b>2</b>     |
| STUDIENUMMER                  | 101  | 102  | 103  | 104  | 105  | 106     | 107     | 108     | 109     | 110     | Mean         | SD          | Median       |
| Norepinephrine h post surgery | 11   | 36   | 12   | 0    | 0    | 0       | 23      | 0       | 17      | 17      | <b>11,6</b>  | <b>12,1</b> | <b>11,5</b>  |
| P-CRP routine d0 - d-30       | 2    | 4    | <1   | 7    | 3    | 2       | 0,9     | 1       | 30      | 0,9     | <b>5,6</b>   | <b>9,3</b>  | <b>2</b>     |
| P-CRP routine d1              | 24   | 53   | 33   | 86   | 62   | 32      | missing | 26      | 86      | 54      | <b>50,7</b>  | <b>24,0</b> | <b>53</b>    |
| P-CRP routine d2              | 46   | 129  | 131  | 250  | 116  | 32      | 110     | 46      | 174     | 177     | <b>121,1</b> | <b>68,4</b> | <b>122,5</b> |
| P-CRP routine d3              | 21   | 83   | 186  | 276  | 86   | 61      | 90      | 45      | missing | 257     | <b>122,8</b> | <b>93,4</b> | <b>86</b>    |
| P-CRP routine d4              | 10   | 38   | 134  | 232  | 44   | missing | 53      | 23      | missing | 180     | <b>89,3</b>  | <b>82,2</b> | <b>48,5</b>  |
| P-CRP routine d5              | 21   | 68   | 103  | 252  | 43   | missing | 50      | missing | missing | missing | <b>89,5</b>  | <b>84,2</b> | <b>59</b>    |
| P-CRP routine d6              | 10   | 97   |      |      |      |         |         |         |         | 64      |              |             |              |
| LPK routine d1                | 7,4  | 8,3  |      |      | 12,1 | 17,9    |         |         |         |         | <b>11,4</b>  | <b>4,8</b>  | <b>10,2</b>  |
| B-LPK (study assessment)      | 7    | 9    | 10,1 | 21   | 11,8 | 15,1    | 10,8    | 8       | 19,3    | 12,4    | <b>12,5</b>  | <b>4,7</b>  | <b>11,3</b>  |
| LPK routine d3                | 5    | 10,6 | 10,4 |      |      |         | 11,7    |         |         |         | <b>9,4</b>   | <b>3,0</b>  | <b>10,5</b>  |
| LPK routine d4                | 4,5  | 9    |      |      |      |         | 10,6    |         |         |         | <b>8,0</b>   | <b>3,2</b>  | <b>9</b>     |
| LPK routine d5                | 5    | 8,9  |      |      |      |         | 9,6     |         |         |         | <b>7,8</b>   | <b>2,5</b>  | <b>8,9</b>   |
| Subject                       | 101  | 102  | 103  | 104  | 105  | 106     | 107     | 108     | 109     | 110     | Medel        | SD          | Median       |

# Mass balance calculations for Hb and albumin

Data 0-60 min

| subject          | 101    | 102    | 103   | 104    | 105    | 106   | 107    | 108    | 109    | 110   | Mean   | SD    | Median |
|------------------|--------|--------|-------|--------|--------|-------|--------|--------|--------|-------|--------|-------|--------|
| TER day0         | 3,223  | 5,005  | 2,484 | 0,702  | 7,726  | 4,085 | 9,908  | 5,395  | 5,676  | 4,975 | 4,918  | 2,601 | 4,990  |
| TER day2         | 2,534  | 4,704  | 4,723 | 10,046 | 6,988  | 4,802 | 3,888  | 3,165  | 7,738  | 6,808 | 5,540  | 2,313 | 4,763  |
| PV day0          | 4197   | 2924   | 2721  | 3078   | 2644   | 3938  | 2397   | 3414   | 4178   | 3614  | 3311   | 655   | 3246   |
| PV day2          | 4419   | 2630   | 2845  | 2795   | 3390   | 3686  | 2791   | 3917   | 3341   | 3347  | 3316   | 574   | 3344   |
| CRP day0         | 0,47   | 3,38   | 0,52  | 6,51   | 2,9    | 0,83  | 0,63   | 0,97   | 16,17  | 0,68  | 3,31   | 4,91  | 0,90   |
| CRP day2         | 42,1   | 135,0  | 144,6 | 233,6  | 119,9  | 35,7  | 111,5  | 25,1   | 194,6  | 199,6 | 124,2  | 72,8  | 127,4  |
| P-alb day0       | 35,3   | 28,8   | 36,7  | 39,3   | 35,6   | 32,2  | 32,6   | 33,4   | 26,7   | 34,7  | 33,5   | 3,7   | 34,1   |
| P-alb day2       | 24,9   | 17,7   | 25,5  | 25,6   | 19,5   | 23,9  | 23,1   | 19     | 18,2   | 23,4  | 22,1   | 3,1   | 23,3   |
| IAM day0         | 148    | 84     | 100   | 121    | 94     | 127   | 78     | 114    | 112    | 125   | 110    | 21    | 113    |
| IAM day2         | 110    | 47     | 73    | 72     | 66     | 88    | 64     | 74     | 61     | 78    | 73     | 17    | 72     |
| Jalb day0        | 477,5  | 421,5  | 248,0 | 84,9   | 727,3  | 518,1 | 774,3  | 615,2  | 633,1  | 624,0 | 512,4  | 214,6 | 566,7  |
| Jalb day2        | 278,8  | 218,9  | 342,7 | 718,9  | 461,9  | 423,1 | 250,7  | 235,6  | 470,5  | 533,2 | 393,4  | 159,3 | 382,9  |
| diff TER         | -68,9  | -30,1  | 224,0 | 934,4  | -73,8  | 71,7  | -602,0 | -223,0 | 206,3  | 183,3 | 62,2   | 392,9 | 20,8   |
| diff PV          | 222    | -294   | 124   | -283   | 745    | -252  | 394    | 503    | -837   | -267  | 5      | 475   | -64    |
| diff CRP         | 41,6   | 131,6  | 144,1 | 227,0  | 117,0  | 34,9  | 110,9  | 24,1   | 178,5  | 198,9 | 120,9  | 70,3  | 124,3  |
| diff Palb        | -10,4  | -11,1  | -11,2 | -13,7  | -16,1  | -8,3  | -9,5   | -14,4  | -8,5   | -11,3 | -11,5  | 2,6   | -11,2  |
| diff IAM         | -38    | -38    | -27   | -49    | -28    | -39   | -14    | -40    | -51    | -47   | -37    | 11    | -38    |
| diff Jalb        | -198,7 | -202,5 | 94,7  | 634,0  | -265,4 | -95,0 | -523,6 | -379,7 | -162,6 | -90,8 | -119,0 | 313,1 | -180,6 |
| subject          | 101    | 102    | 103   | 104    | 105    | 106   | 107    | 108    | 109    | 110   | Mean   | SD    | Median |
| Bleeding, ml     | 3700   | 2600   | 800   | 1800   | 700    | 650   | 500    | 1400   | 850    | 520   | 1352   | 1063  | 825    |
| E-konc, ml       | 1500   | 1000   | 0     | 0      | 0      | 0     | 500    | 500    | 750    | 0     | 425    | 528   | 250    |
| Drains, ml       | 825    | 240    | 685   | 640    | 590    | 505   | 260    | 445    | 1050   | 600   | 584    | 244   | 595    |
| Plasma, ml       | 1500   | 250    | 0     | 0      | 0      | 0     | 500    | 250    | 0      | 0     | 250    | 471   | 0      |
| Albumin [g]      | 0      | 0      | 25    | 37,5   | 0      | 0     | 0      | 0      | 0      | 0     | 6,25   | 13,50 | 0,00   |
| Hb day0          | 131,0  | 141,0  | 136,0 | 138,0  | 136,5  | 149,0 | 135,0  | 134,0  | 98,0   | 153,0 | 135,2  | 14,7  | 136,3  |
| Mean Hb (per-op) | 101,0  | 105,6  | 122,0 | 108,0  | 109,3  | 146,0 | 100,7  | 120,1  | 94,2   | 127,0 | 113,4  | 15,5  | 108,6  |
| htk day0         | 0,4    | 0,4    | 0,4   | 0,4    | 0,4    | 0,5   | 0,4    | 0,4    | 0,3    | 0,5   | 0,4    | 0,0   | 0,4    |
| BV day0          | 7      | 5      | 4     | 5      | 4      | 7     | 4      | 5      | 6      | 6     | 5      | 1     | 5      |
| MHb day0         | 868    | 680    | 597   | 692    | 584    | 1005  | 520    | 732    | 566    | 965   | 721    | 171   | 686    |
| Hb day2          | 104,0  | 92,0   | 98,0  | 113,0  | 95,0   | 115,0 | 104,0  | 96,0   | 102,0  | 114,0 | 103,3  | 8,3   | 103,0  |
| htk day2         | 0,32   | 0,29   | 0,30  | 0,35   | 0,30   | 0,36  | 0,32   | 0,30   | 0,32   | 0,35  | 0,32   | 0,03  | 0,32   |
| BV day2          | 6,3    | 3,6    | 3,9   | 4,1    | 4,6    | 5,4   | 3,9    | 5,4    | 4,7    | 4,9   | 4,7    | 0,8   | 4,7    |
| MHb day2         | 650    | 327    | 385   | 463    | 440    | 626   | 411    | 516    | 478    | 561   | 486    | 104   | 471    |
| MB Hb day2       | 764,1  | 590,2  | 489,4 | 487,7  | 498,4  | 902,1 | 465,7  | 557,0  | 611,2  | 889,6 | 625,6  | 166,9 | 573,6  |
| Hb "missing g"   | 114,0  | 263,1  | 103,9 | 24,8   | 58,3   | 275,9 | 55,1   | 41,1   | 132,9  | 328,3 | 139,8  | 109,6 | 109,0  |

# Mass balance calculations for Hb and albumin

|                     |            |            |            |            |            |            |            |            |            |            |               |              |               |
|---------------------|------------|------------|------------|------------|------------|------------|------------|------------|------------|------------|---------------|--------------|---------------|
| Blood "missing" Hb  | 1096       | 2860       | 1060       | 220        | 613        | 2399       | 530        | 428        | 1303       | 2880       | <b>1339</b>   | <b>1012</b>  | <b>1078</b>   |
| IAM losses          | -85,36     | -43,79     | -25,61     | -46,19     | -20,69     | -18,06     | -12,64     | -30,62     | -27,35     | -17,26     | <b>-32,76</b> | <b>21,50</b> | <b>-26,48</b> |
| IAM gains           | 51,00      | 8,50       | 25,00      | 37,50      | 0,00       | 0,00       | 17,00      | 8,50       | 0,00       | 0,00       | <b>14,75</b>  | <b>17,92</b> | <b>8,50</b>   |
| IAM day2 MB         | 113,8      | 48,9       | 99,3       | 112,3      | 73,4       | 108,8      | 82,5       | 91,9       | 84,2       | 108,1      | <b>92,3</b>   | <b>20,6</b>  | <b>95,6</b>   |
| alb MB              | 34,4       | 35,3       | 0,6        | 8,7        | 20,7       | 18,1       | -4,4       | 22,1       | 27,3       | 17,3       | <b>18,0</b>   | <b>13,2</b>  | <b>19,4</b>   |
| alb "missing g"     | 4          | 2          | 27         | 41         | 7          | 21         | 18         | 17         | 23         | 30         | <b>19</b>     | <b>12</b>    | <b>19</b>     |
| Blood "missing" alb | 151        | 134        | 1047       | 1591       | 377        | 864        | 781        | 921        | 1286       | 1275       | <b>843</b>    | <b>494</b>   | <b>892</b>    |
| BV Nadler day0      | 5,43       | 4,00       | 3,80       | 5,38       | 3,92       | 5,75       | 3,33       | 4,60       | 5,27       | 5,48       | <b>4,70</b>   | <b>0,87</b>  | <b>4,93</b>   |
| BV Nadler day2      | 5,44       | 4,18       | 3,89       | 5,50       | 4,05       | 5,78       | 3,36       | 4,72       | 5,39       | 5,53       | <b>4,78</b>   | <b>0,85</b>  | <b>5,05</b>   |
| PVNadler day0       | 3,44       | 2,43       | 2,35       | 3,30       | 2,43       | 3,36       | 2,07       | 2,87       | 3,81       | 3,14       | <b>2,92</b>   | <b>0,58</b>  | <b>3,01</b>   |
| PVNadler day2       | 3,84       | 3,09       | 2,82       | 3,75       | 2,96       | 3,91       | 2,38       | 3,44       | 3,84       | 3,76       | <b>3,38</b>   | <b>0,54</b>  | <b>3,59</b>   |
| gender              | m          | f          | f          | m          | f          | m          | f          | m          | m          | m          |               |              |               |
| height, cm          | 183        | 164        | 159        | 179        | 168        | 189        | 160        | 173        | 173        | 179        | <b>173</b>    | <b>10</b>    | <b>173</b>    |
| weight day0, kg     | 80,00      | 68,00      | 66,00      | 83,00      | 62,00      | 83,00      | 51,00      | 65,00      | 86,00      | 86,00      | <b>73,00</b>  | <b>12,16</b> | <b>74,00</b>  |
| weight day2, kg     | 80,30      | 73,30      | 68,90      | 86,60      | 65,70      | 83,80      | 52,00      | 68,70      | 89,70      | 87,60      | <b>75,66</b>  | <b>12,05</b> | <b>76,80</b>  |
| diff weight         | 0,30       | 5,30       | 2,90       | 3,60       | 3,70       | 0,80       | 1,00       | 3,70       | 3,70       | 1,60       | <b>2,66</b>   | <b>1,64</b>  | <b>3,25</b>   |
| diff IAM%           | 26         | 45         | 27         | 41         | 30         | 31         | 17         | 35         | 45         | 38         | <b>33</b>     | <b>9</b>     | <b>33</b>     |
| diff MHb%           | 25,12      | 51,93      | 35,46      | 33,08      | 24,60      | 37,67      | 21,04      | 29,51      | 15,49      | 41,81      | <b>31,57</b>  | <b>10,74</b> | <b>31,29</b>  |
| <b>subject</b>      | <b>101</b> | <b>102</b> | <b>103</b> | <b>104</b> | <b>105</b> | <b>106</b> | <b>107</b> | <b>108</b> | <b>109</b> | <b>110</b> | <b>Mean</b>   | <b>SD</b>    | <b>Median</b> |

## Abbreviations and explanations

|                    |                                                                                                                        |
|--------------------|------------------------------------------------------------------------------------------------------------------------|
| <b>BV</b>          | Blood volume, L; $BV = 0,91 * PV / ((1 - htk) * 1000)$ ; an F-ratio of 0.91 is assumed                                 |
| <b>BV Nadler</b>   | Anthropometric blood volume according to Nadler 1962, L                                                                |
| <b>CRP</b>         | Plasma C-reactive protein (sensitive), mikromol/L                                                                      |
| <b>diff</b>        | Difference: day2-day0                                                                                                  |
| <b>E-konc</b>      | Packed red cells                                                                                                       |
| <b>Hb</b>          | Blood Haemoglobin, g                                                                                                   |
| <b>Hb missing</b>  | Mass balance Hb - MHb day2                                                                                             |
| <b>Htk</b>         | Blood Hematocrit, fraction                                                                                             |
| <b>IAM</b>         | Intravascular albumin mass, g                                                                                          |
| <b>IAM day2 MB</b> | IAM day2 mass balance = IAM day0 - bleeding - losses in drains - occult bleeding + albumin in plasma inf + albumin inf |
| <b>Jalb</b>        | Albumin mass flow rate out from the blood g/d                                                                          |
| <b>MB Hb day2</b>  | Mass balance Hb day2 = MHb day0 - bleeding-drains - occult bleeding + red packed cells                                 |
| <b>MHb</b>         | Intravascular haemoglobin mass = B-Hb * blood volume                                                                   |
| <b>P-alb</b>       | Plasma albumin, g/L                                                                                                    |
| <b>Plasma</b>      | Plasma is containing albumin 34 g/L on average                                                                         |
| <b>PV</b>          | Plasma volume, ml                                                                                                      |
| <b>PV Nadler</b>   | Anthropometric plasma volume derived from BV Nadler * (1 - 0.91 * hkt)                                                 |
| <b>TER</b>         | Transcapillary escape rate, %/h                                                                                        |



# Surgery and Fluid Balance

| SUBJECT #                                 | 101  | 102  | 103  | 104  | 105  | 106  | 107  | 108  | 109  | 110  | Mean   | sd     | Median |
|-------------------------------------------|------|------|------|------|------|------|------|------|------|------|--------|--------|--------|
| <b>Anaesthesia record</b>                 |      |      |      |      |      |      |      |      |      |      |        |        |        |
| Op-bleedning, ml                          | 3700 | 2600 | 800  | 1800 | 700  | 650  | 500  | 1400 | 850  | 520  | 1352,0 | 1062,8 | 825    |
| Diuresis, ml                              | 800  | 760  | 1462 | 787  | 615  | 405  | 550  | 1100 | 370  | 765  | 761,4  | 325,6  | 762,5  |
| Perspiratio, ml                           | 2240 | 1235 | 2010 | 2725 | 2045 | 1760 | 850  | 2590 | 1615 | 2337 | 1940,7 | 589,3  | 2027,5 |
| Drains, ventricel tube, misc, ml          | 0    | 50   | 210  | 100  | 0    | 0    | 0    | 200  | 75   | 150  | 78,5   | 83,7   | 62,5   |
| Glucose 2,5 mg/ml bufferd per-op, ml      | 489  | 900  | 917  | 674  | 396  | 470  | 600  | 660  | 520  | 958  | 658,4  | 203,0  | 630    |
| Ringer-Acetat per-op, ml                  | 1427 | 1000 | 2109 | 2460 | 2070 | 1505 | 1300 | 1728 | 1800 | 2069 | 1746,8 | 443,4  | 1764   |
| Volulyte per-op, ml                       | 2855 | 1900 | 1782 | 2500 | 2732 | 1330 | 950  | 2500 | 1133 | 1500 | 1918,2 | 692,1  | 1841   |
| E-konc per-op, ml                         | 1000 | 1000 | 0    | 0    | 0    | 0    | 0    | 500  | 500  | 0    | 300,0  | 421,6  | 0      |
| Plasma per-op, ml                         | 1000 | 250  | 0    | 0    | 0    | 0    | 0    | 250  | 0    | 0    | 150,0  | 316,2  | 0      |
| Albumin 50 mg/ml                          | 0    | 0    | 0    | 250  | 0    | 0    | 0    | 0    | 0    | 0    | 25,0   | 79,1   | 0      |
| Macrodex, ml                              | 0    | 0    | 0    | 0    | 500  | 0    | 0    | 0    | 0    | 0    | 50,0   | 158,1  | 0      |
| Other iv fluids, ml                       | 0    | 493  | 640  | 619  | 646  | 50   | 126  | 200  | 500  | 0    | 327,4  | 276,8  | 346,5  |
| Fluid balance during surgery, ml          | -43  | 798  | 896  | 1092 | 2484 | 0    | 1076 | 1500 | 1541 | 914  | 1025,8 | 737,8  | 995    |
| <b>"Fluid sheet" balance day 1, 06:00</b> |      |      |      |      |      |      |      |      |      |      |        |        |        |
| Glucose, ml                               | 1850 | 1800 | 1880 | 1500 | 1581 | 1900 | 2400 | 1800 | 1500 |      | 1801,2 | 275,4  | 1800   |
| Ringer-Acetat, ml                         | 3000 | 3000 | 3000 | 4000 | 2000 | 3000 | 2000 | 3000 | 2000 |      | 2777,8 | 666,7  | 3000   |
| Volulyte, ml                              | 3000 | 2500 | 2500 | 2500 | 2000 | 1500 | 1000 | 2500 | 2000 |      | 2166,7 | 612,4  | 2500   |
| E-konc , ml                               | 1000 | 1000 | 0    | 0    | 0    | 0    | 0    | 500  | 500  | 0    | 300,0  | 421,6  | 0      |
| Plasma, ml                                | 1500 | 250  | 0    | 0    | 0    | 0    | 0    | 250  | 0    | 0    | 200,0  | 468,4  | 0      |
| Albumin 50 mg/ml, ml                      | 0    | 0    | 500  | 250  | 0    | 0    | 0    | 0    | 0    | 0    | 75,0   | 168,7  | 0      |
| Macrodex, ml                              | 0    | 0    | 0    | 0    | 0    | 0    | 0    | 500  | 0    | 0    | 50,0   | 158,1  | 0      |
| Fluid for drugs (antibiotics, etc), ml    | 450  | 700  | 600  | 600  | 600  | 684  | 400  | 360  | 950  |      | 593,8  | 180,0  | 600    |
| Perspiratio, ml                           |      |      | 3500 | 3900 | 2500 |      | 500  | 3370 | 2000 |      | 2628,3 | 1254,4 | 2935   |
| Diuresis, ml                              | 2740 | 2180 | 2395 | 1590 | 1680 | 1945 | 1520 | 2360 | 1605 | 1590 | 1960,5 | 431,8  | 1812,5 |
| Drains, ventricel tube, misc, ml          | 100  | 90   | 340  | 740  | 200  | 275  | 160  | 345  | 300  | 250  | 280,0  | 185,6  | 262,5  |
| <b>Take Care day 1, 06:00</b>             |      |      |      |      |      |      |      |      |      |      |        |        |        |
| Glucose, ml                               | 1870 | 1800 | 2300 | 1000 | 2040 | 2000 | 2000 | 1300 | 1500 | 2175 | 1798,5 | 410,0  | 1935   |
| Ringer-Acetat, ml                         | 3000 | 3000 | 3000 | 3000 | 2000 | 3000 | 3000 | 3000 | 2000 | 3000 | 2800,0 | 421,6  | 3000   |
| Volulyte, ml                              | 3000 | 2500 | 2500 | 2500 | 2000 | 1500 | 1000 | 2500 | 2000 | 1500 | 2100,0 | 614,6  | 2250   |
| E-konc , ml                               | 1000 | 1000 | 0    | 0    | 0    | 0    | 0    | 500  | 500  | 0    | 300,0  | 421,6  | 0      |
| Plasma, ml                                | 1500 | 250  | 0    | 0    | 0    | 0    | 0    | 250  | 0    | 0    | 200,0  | 468,4  | 0      |
| Albumin 50 mg/ml, ml                      | 0    | 0    | 0    | 250  | 0    | 0    | 0    | 0    | 0    | 0    | 25,0   | 79,1   | 0      |
| Macrodex, ml                              | 0    | 0    | 0    | 0    | 500  | 0    | 0    | 500  | 0    | 0    | 100,0  | 210,8  | 0      |
| Miscellaneous, ml                         | 350  | 825  | 525  | 626  | 860  | 684  | 384  | 550  | 759  | 380  | 594,3  | 187,6  | 588    |
| <b>"Fluid sheet" balance day 2, 06:00</b> |      |      |      |      |      |      |      |      |      |      |        |        |        |
| Diuresis, ml                              | 2870 | 2635 | 1760 | 2260 | 2230 | 3350 | 2055 | 2055 | 1500 | 2030 | 2274,5 | 544,1  | 2142,5 |
| Drains, ml                                | 575  | 100  | 225  | 0    | 390  | 230  | 100  | 100  | 750  | 350  | 282,0  | 237,1  | 227,5  |

| <b>Take Care day 2, 06:00</b>             |            |            |            |            |            |            |            |            |            |            |                |               |                |
|-------------------------------------------|------------|------------|------------|------------|------------|------------|------------|------------|------------|------------|----------------|---------------|----------------|
| Glucose, ml                               | 1690       | 2000       | 1600       | 1981       | 1000       | 1685       | 2020       | 2550       | 2000       | 2000       | <b>1852,6</b>  | <b>400,2</b>  | <b>1990,5</b>  |
| Ringer-Acetate, ml                        | 1000       | 1000       | 2000       | 1000       | 1000       | 1000       | 200        | 1000       | 1000       | 1000       | <b>1020,0</b>  | <b>426,4</b>  | <b>1000</b>    |
| Volulyte, ml                              | 0          | 500        | 0          | 0          | 0          | 500        | 500        | 500        | 1000       | 500        | <b>350,0</b>   | <b>337,5</b>  | <b>500</b>     |
| E-konc , ml                               | 500        | 0          | 0          | 0          | 0          | 0          | 500        | 0          | 250        | 0          | <b>125,0</b>   | <b>212,5</b>  | <b>0</b>       |
| Plasma, ml                                | 0          | 0          | 0          | 0          | 0          | 0          | 500        | 0          | 0          | 0          | <b>50,0</b>    | <b>158,1</b>  | <b>0</b>       |
| Albumin 50 mg/ml, ml                      | 0          | 0          | 500        | 500        | 0          | 0          | 0          | 0          | 0          | 0          | <b>100,0</b>   | <b>210,8</b>  | <b>0</b>       |
| Macrodex, ml                              | 0          | 0          | 0          | 0          | 0          | 0          | 0          | 500        | 0          | 0          | <b>50,0</b>    | <b>158,1</b>  | <b>0</b>       |
| Miscellaneous, ml                         | 457        | 262        | 529        | 520        | 595        | 527        | 641        | 300        | 200        | 238        | <b>426,9</b>   | <b>161,4</b>  | <b>488,5</b>   |
| <b>TC day 2 until sampling</b>            |            |            |            |            |            |            |            |            |            |            |                |               |                |
|                                           | kl 10:02   | kl 09:00   | kl 08:20   | kl 08:42   | kl 09:37   | kl 10:03   | kl 10:17   | kl 08:54   | kl 08:38   | kl 08:10   |                |               |                |
| Glucos + chrystalloids, ml                | 320        | 240        | 192        | 430        | 0          | 320        | 320        | 230        | 210        | 170        | <b>243,2</b>   | <b>116,0</b>  | <b>235</b>     |
| Macrodex + volulyte, ml                   | 0          | 0          | 0          | 0          | 300        | 240        | 0          | 0          | 0          | 0          | <b>54,0</b>    | <b>114,7</b>  | <b>0</b>       |
| <b>"Fluid sheet" day 2 until sampling</b> |            |            |            |            |            |            |            |            |            |            |                |               |                |
| Diuresis, ml                              | 790        | 440        | 90         | 130        | 50         | 600        | 115        | 85         | 70         | 140        | <b>251,0</b>   | <b>262,5</b>  | <b>122,5</b>   |
| <b>SUBJECT #</b>                          | <b>101</b> | <b>102</b> | <b>103</b> | <b>104</b> | <b>105</b> | <b>106</b> | <b>107</b> | <b>108</b> | <b>109</b> | <b>110</b> | <b>Mean</b>    | <b>sd</b>     | <b>Median</b>  |
| <b>Sum chrystalloid d0-d2 TC</b>          | 8687       | 9127       | 10146      | 8557       | 7495       | 9216       | 8565       | 8930       | 7669       | 8963       | <b>8735,5</b>  | <b>760,3</b>  | <b>8808,5</b>  |
| <b>Sum colloid d0-d2 TC</b>               | 3000       | 3000       | 2500       | 2500       | 2800       | 2240       | 1500       | 4000       | 3000       | 2000       | <b>2654,0</b>  | <b>680,7</b>  | <b>2650</b>    |
| <b>Sum E-konc TC</b>                      | 1500       | 1000       | 0          | 0          | 0          | 0          | 500        | 500        | 750        | 0          | <b>425,0</b>   | <b>527,7</b>  | <b>250</b>     |
| <b>Sum Plasma TC</b>                      | 1500       | 250        | 0          | 0          | 0          | 0          | 500        | 250        | 0          | 0          | <b>250,0</b>   | <b>471,4</b>  | <b>0</b>       |
| <b>Sum Albumin TC</b>                     | 0          | 0          | 500        | 750        | 0          | 0          | 0          | 0          | 0          | 0          | <b>125,0</b>   | <b>270,0</b>  | <b>0</b>       |
| <b>Sum IN</b>                             | 14687      | 13377      | 13146      | 11807      | 10295      | 11456      | 11065      | 13680      | 11419      | 10963      | <b>12189,5</b> | <b>1430,6</b> | <b>11631,5</b> |
| <b>Diuresis d0-d2 "fluid sheets"</b>      | 6400       | 5255       | 4245       | 3980       | 3960       | 5895       | 3690       | 4500       | 3175       | 3760       | <b>4486,0</b>  | <b>1038,7</b> | <b>4112,5</b>  |
| <b>Drain "fluid sheet"</b>                | 675        | 190        | 565        | 740        | 590        | 505        | 260        | 445        | 1050       | 600        | <b>562,0</b>   | <b>243,0</b>  | <b>577,5</b>   |
| <b>Bleeding</b>                           | 3700       | 2600       | 800        | 1800       | 700        | 650        | 500        | 1400       | 850        | 520        | <b>1352,0</b>  | <b>1062,8</b> | <b>825</b>     |
| <b>"Perspiratio + basal need"</b>         |            |            |            |            |            |            |            |            |            |            |                |               |                |
| <b>Sum OUT</b>                            | 10775      | 8045       | 5610       | 6520       | 5250       | 7050       | 4450       | 6345       | 5075       | 4880       | <b>6400,0</b>  | <b>1888,6</b> | <b>5977,5</b>  |
| <b>Fluid Balance</b>                      | 3912       | 5332       | 7536       | 5287       | 5045       | 4406       | 6615       | 7335       | 6344       | 6083       | <b>5789,5</b>  | <b>1200,4</b> | <b>5707,5</b>  |

"Fluid sheets" is a paper document for documentation of fluids, diuresis, etc

Take Care (TC) is our electronic record system (manual input, no electronic capture of data)
